# Supplementary material for: MXene Enhanced 3D Needled Waste Denim Felt for High-Performance Flexible Supercapacitors
Source: PubMed Central journal article supplement (PMC10686952; doi:10.1007/s40820-023-01226-y), 2023-11-29
Supplement: 40820_2023_1226_MOESM2_ESM.pdf [file 40820_2023_1226_MOESM2_ESM.pdf]

Supporting Information for

## **MXene Enhanced 3D Needled Waste Denim Felt for High-Performance Flexible Supercapacitors**

Wei Fan <sup>1,\*</sup>, Qi Wang <sup>1</sup>, Kai Rong <sup>1</sup>, Yang Shi <sup>2</sup>, Wanxi Peng <sup>3,\*</sup>, Handong Li<sup>4</sup>, Zhanhu Guo <sup>4,\*</sup>, Ben Bin Xu <sup>4</sup>, Hua Hou<sup>5</sup>, Hassan Algadi <sup>6</sup>, Shengbo Ge <sup>2,\*</sup>

<sup>1</sup> School of Textile Science and Engineering, Key Laboratory of Functional Textile Material and Product of the Ministry of Education, Xi'an Polytechnic University, Xi'an, Shaanxi 710048, P. R. China

<sup>2</sup> Jiangsu Co-Innovation Center of Efficient Processing and Utilization of Forest Resources, International Innovation Center for Forest Chemicals and Materials, College of Materials Science and Engineering, Nanjing Forestry University, Nanjing, Jiangsu 210037, P. R. China

<sup>3</sup> Henan Province International Collaboration Lab of Forest Resources Utilization, School of Forestry, Henan Agricultural University, Zhengzhou 450002, P. R. China

<sup>4</sup> Integrated Composites Lab, Department of Mechanical and Construction Engineering, Northumbria University, Newcastle Upon Tyne, NE1 8ST, UK

<sup>5</sup> College of Materials Science and Engineering, Taiyuan University of Science and Technology, Taiyuan 030024, P. R. China

<sup>6</sup>Department of Electrical Engineering, Faculty of Engineering, Najran University, Najran, 11001, Saudi Arabia

\*Corresponding authors. E-mail: [fanwei@xpu.edu.cn](mailto:fanwei@xpu.edu.cn) (Wei Fan); [pengwanxi@163.com](mailto:pengwanxi@163.com) (Wanxi Peng); [zhanhu.guo@northumbria.ac.uk](mailto:zhanhu.guo@northumbria.ac.uk) (Zhanhu Guo); [geshengbo@njfu.edu.cn](mailto:geshengbo@njfu.edu.cn) (Shengbo Ge)

Supplementary Figures and Tables

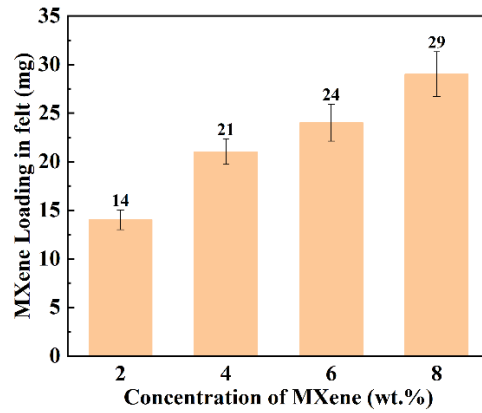

**Fig. S1** Load amounts of MXene of DF after dipping different concentrations of MXene aqueous solution

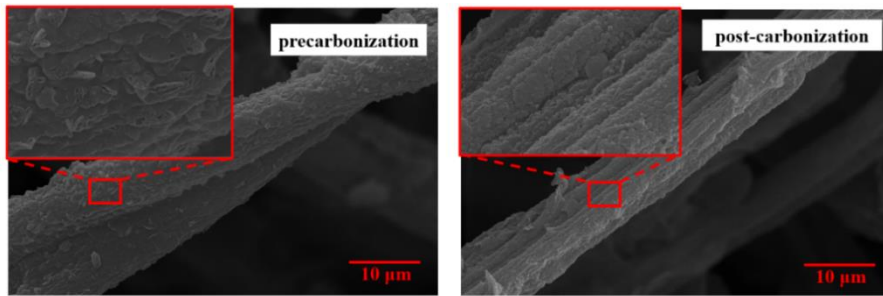

**Fig. S2** MXene morphology on DF before and after carbonization

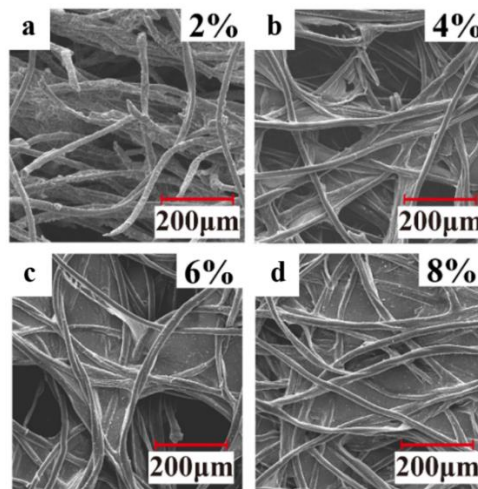

**Fig. S3** SEM images of MDF impregnated from different MXene concentrations: (a) 2 wt.%, (b) 4 wt.%, (c) 6 wt.%, and (d) 8 wt.%, respectively

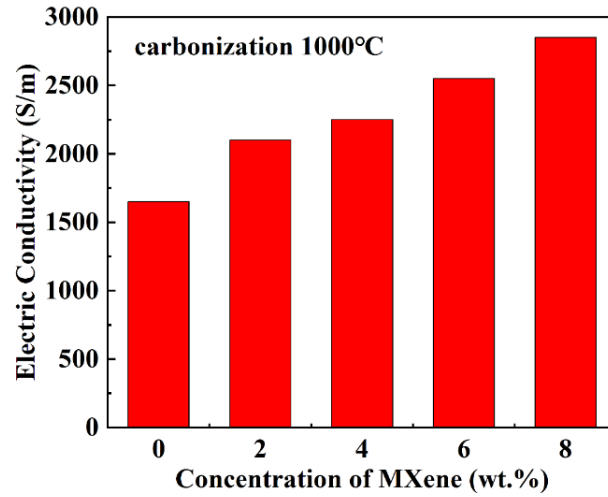

**Fig. S4** Electrical conductivity of CMDF impregnated from different MXene concentrations

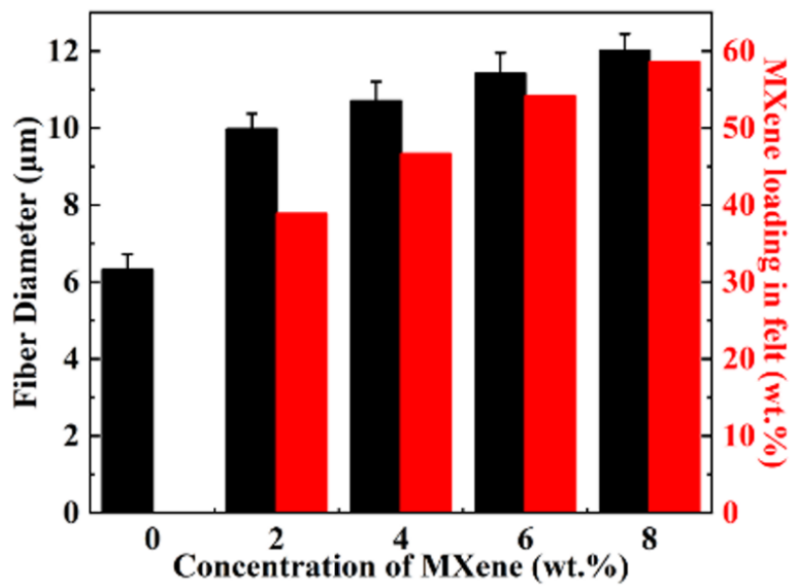

**Fig. S5** Histogram of fiber diameter and MXene load in MDF impregnated from different MXene concentrations

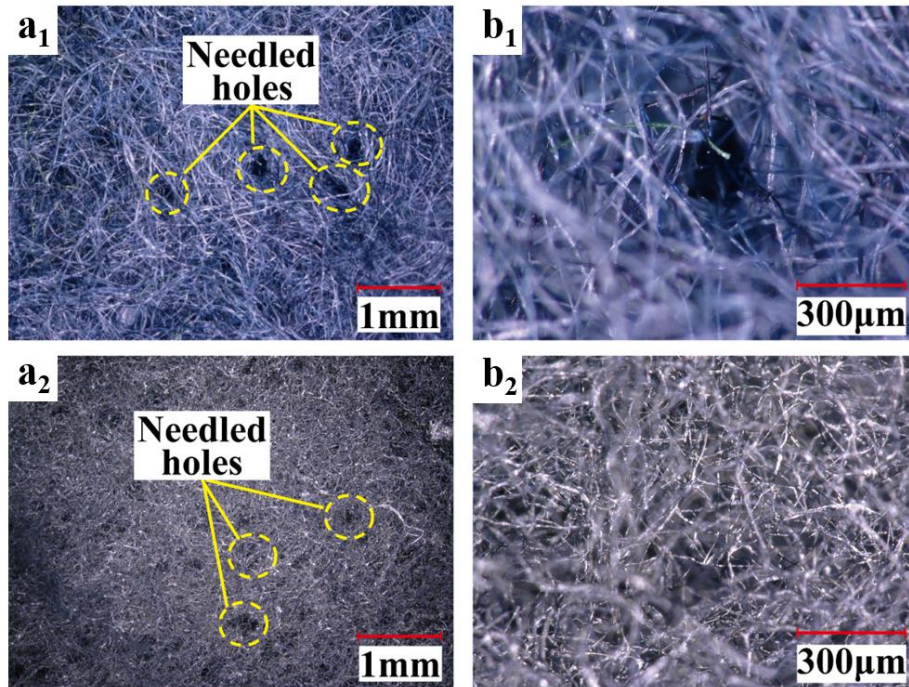

**Fig. S6** SEM images of the DF at (a<sub>1</sub>) low resolution and (b<sub>1</sub>) high resolution; SEM images of the CDF at (a<sub>2</sub>) low resolution and (b<sub>2</sub>) high resolution

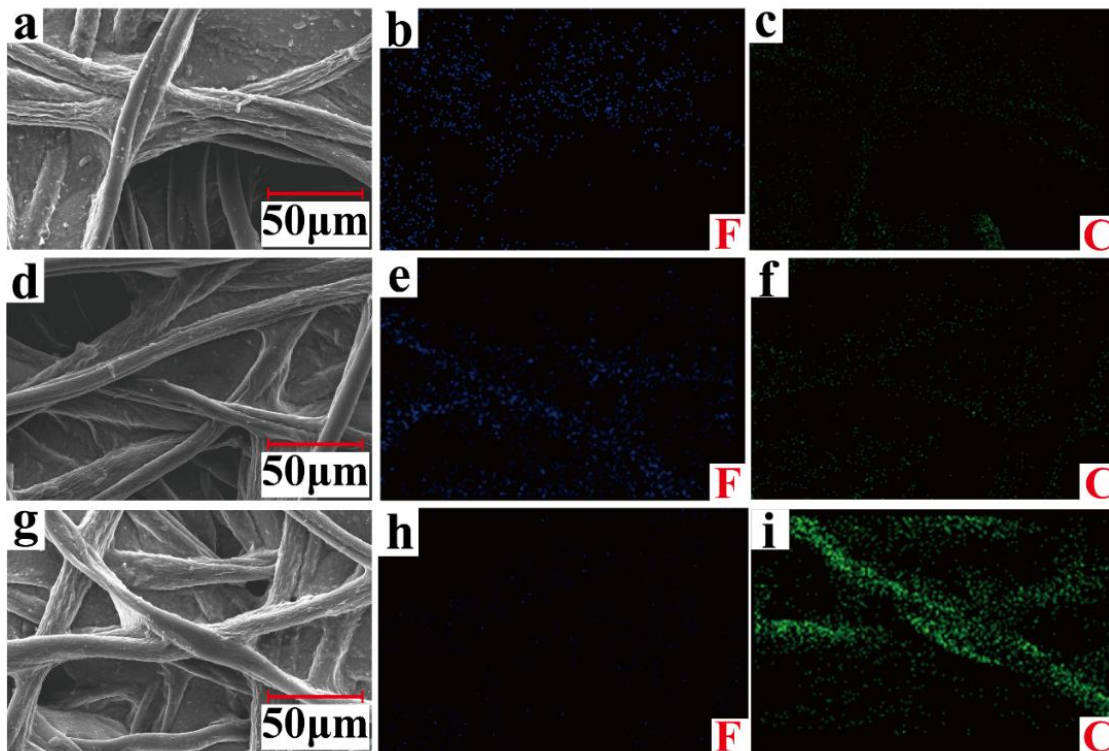

**Fig. S7** EDX mapping results of CMDF at different carbonization temperatures: (a- c) 800 °C, (d-f) 1000 °C, (g-i) 1200 °C

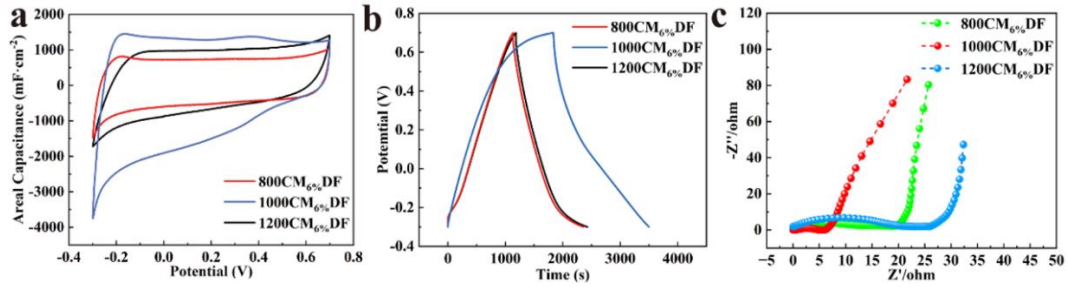

**Fig. S8** (a) CV curves, (b) GCD curves and (c) EIS spectra of CMDF at different carbonization temperatures

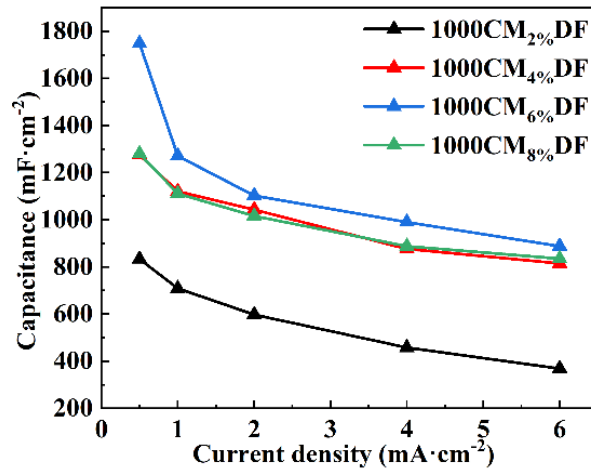

**Fig. S9** The electrochemical performance of CMDF with different MXene loadings

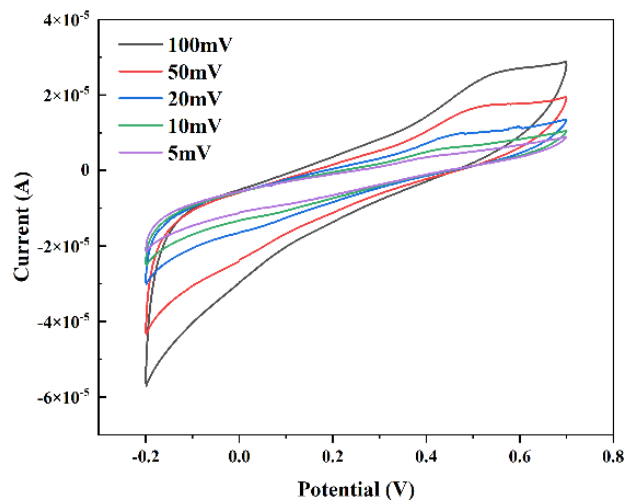

**Fig. S10** CV plot of the supercapacitor assembled by CDF

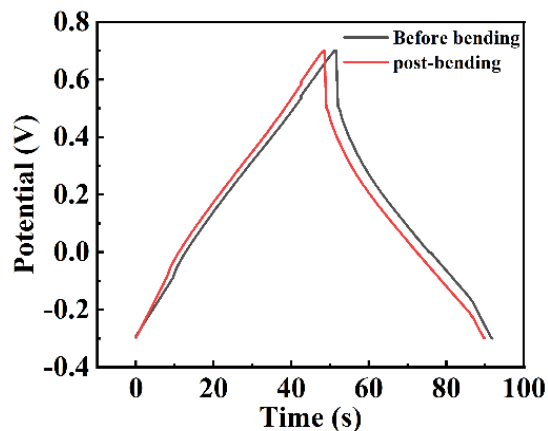

Fig. S11 GCD of the supercapacitor before and after 1000 cycles bending with 180 degrees

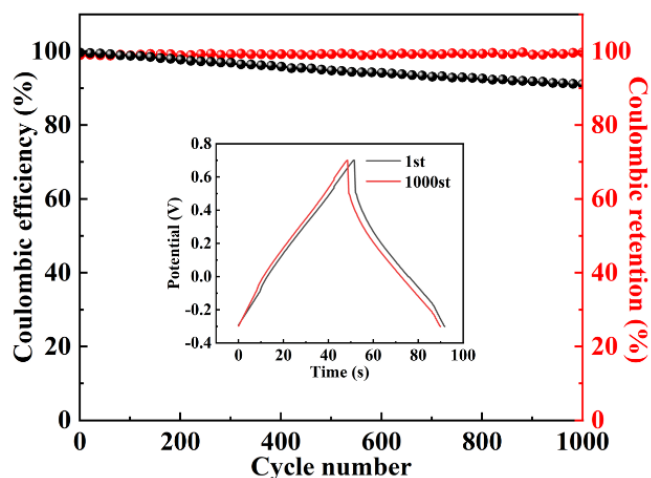

Fig. S12 GCD of the supercapacitor before and after folding for 1000 cycles

Table S1 Comparison of mass loading with other relevant works

| Active materials | Substrate                      | Mass loading             | Refs.     |
|------------------|--------------------------------|--------------------------|-----------|
| MXene            | Silk-derived carbon cloth      | 2 mg cm <sup>-2</sup>    | [S1]      |
| MXene            | Silver-plated nylon fiber      | 0.8 mg cm <sup>-1</sup>  | [S2]      |
| MXene            | Cellulose Yarns                | 2.2 mg cm <sup>-1</sup>  | [S3]      |
| MXene            | Cotton yarn                    | 0.62 mg cm <sup>-1</sup> | [S4]      |
| MXene            | Cotton fabric                  | 3 mg cm <sup>-2</sup>    | [S5]      |
| MXene            | denim waste fiber needle felts | 30 mg cm <sup>-2</sup>   | This work |
| MXene            | /                              | 12 mF cm <sup>-2</sup>   | [1]       |
| MXene            | /                              | 182 F g <sup>-1</sup>    | [2]       |
| MXene            | /                              | 34.87 mFcm <sup>-2</sup> | [3]       |

## Supplementary References

- [S1] M. Hu, T. Hu, R. Cheng et al., MXene-coated silk-derived carbon cloth toward flexible electrode for supercapacitor application. *J. Energy Chem.* **27**(1), 161-166 (2018). <https://doi.org/10.1016/j.jechem.2017.10.030>
- [S2] M. Hu, Z. Li, G. Li et al., All-solid-state flexible fiber-based mxene supercapacitors. *Adv. Mater. Technol.* **2**(10), 1700143 (2017). <https://doi.org/10.1002/admt.201700143>
- [S3] S. Uzun, S. Seyedin, A.L. Stoltzfus et al., Knittable and washable multifunctional MXene-coated cellulose yarns. *Adv. Funct. Mater.* **29**(45), 1905015 (2019). <https://doi.org/10.1002/adfm.201905015>
- [S4] K. Jost, D.P. Durkin, L.M. Haverhals et al., Natural fiber welded electrode yarns for knittable textile supercapacitors. *Adv. Energy Mater.* **5**(4), 1401286 (2015). <https://doi.org/10.1002/aenm.201401286>
- [S5] Y. Li, Z. Lu, B.J. Xin et al., All-solid-state flexible supercapacitor of carbonized mxene/cotton fabric for wearable energy storage. *Appl. Surface Sci.* **528** (2020). <https://doi.org/10.1016/j.apsusc.2020.146975>
- [1] C. Zhang, L. McKeon, M.P. Kremer, S.-H. Park, O. Ronan et al., Additive-free MXene inks and direct printing of micro-supercapacitors. *Nat. Commun.* **10**, 1795 (2019). <https://doi.org/10.1038/s41467-019-09398-1>
- [2] J. Tang, W. Yi, X. Zhong, C. (John) Zhang, X. Xiao et al., Laser writing of the restacked titanium carbide MXene for high performance supercapacitors. *Energy Storage Mater.* **32**, 418–424 (2020). <https://doi.org/10.1016/j.ensm.2020.07.028>
- [3] Y. Wu, D. Zhao, J. Zhang, A. Lin, Y. Wang et al., Microscale curling and alignment of  $\text{Ti}_3\text{C}_2\text{T}_x$  MXene by confining aerosol droplets for planar micro-supercapacitors. *ACS Omega* **6**, 33067–33074 (2021). <https://doi.org/10.1021/acsomega.1c05373>
